# Supplementary material
Source: Springer Nature journal article supplement (https://www.springermedizin.de/resource/supplementary/12939_2011_247_MOESM2_ESM.pdf/9550690)

Cum % of ANC by MTP

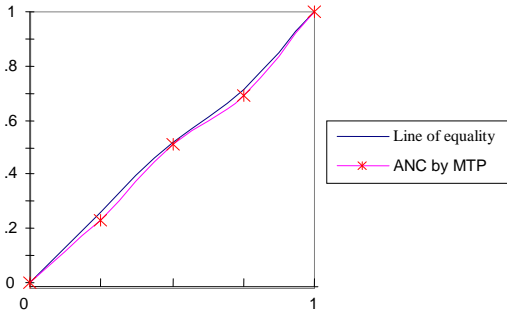

Cum % of women ranked by household wealth

Supplement: MOESM2 [file 9550690]
